# Supplementary material for: Toxicity, quality of life, and PSA control after 50 Gy stereotactic body radiation therapy to the dominant intraprostatic nodule with the use of a rectal spacer: results of a phase I/II study
Source: PubMed Central journal article supplement (PMC10161910; doi:10.1259/bjr.20220803), 2023-03-03
Supplement: bjr.20220803.suppl-01.pdf [file bjr.20220803.suppl-01.pdf]

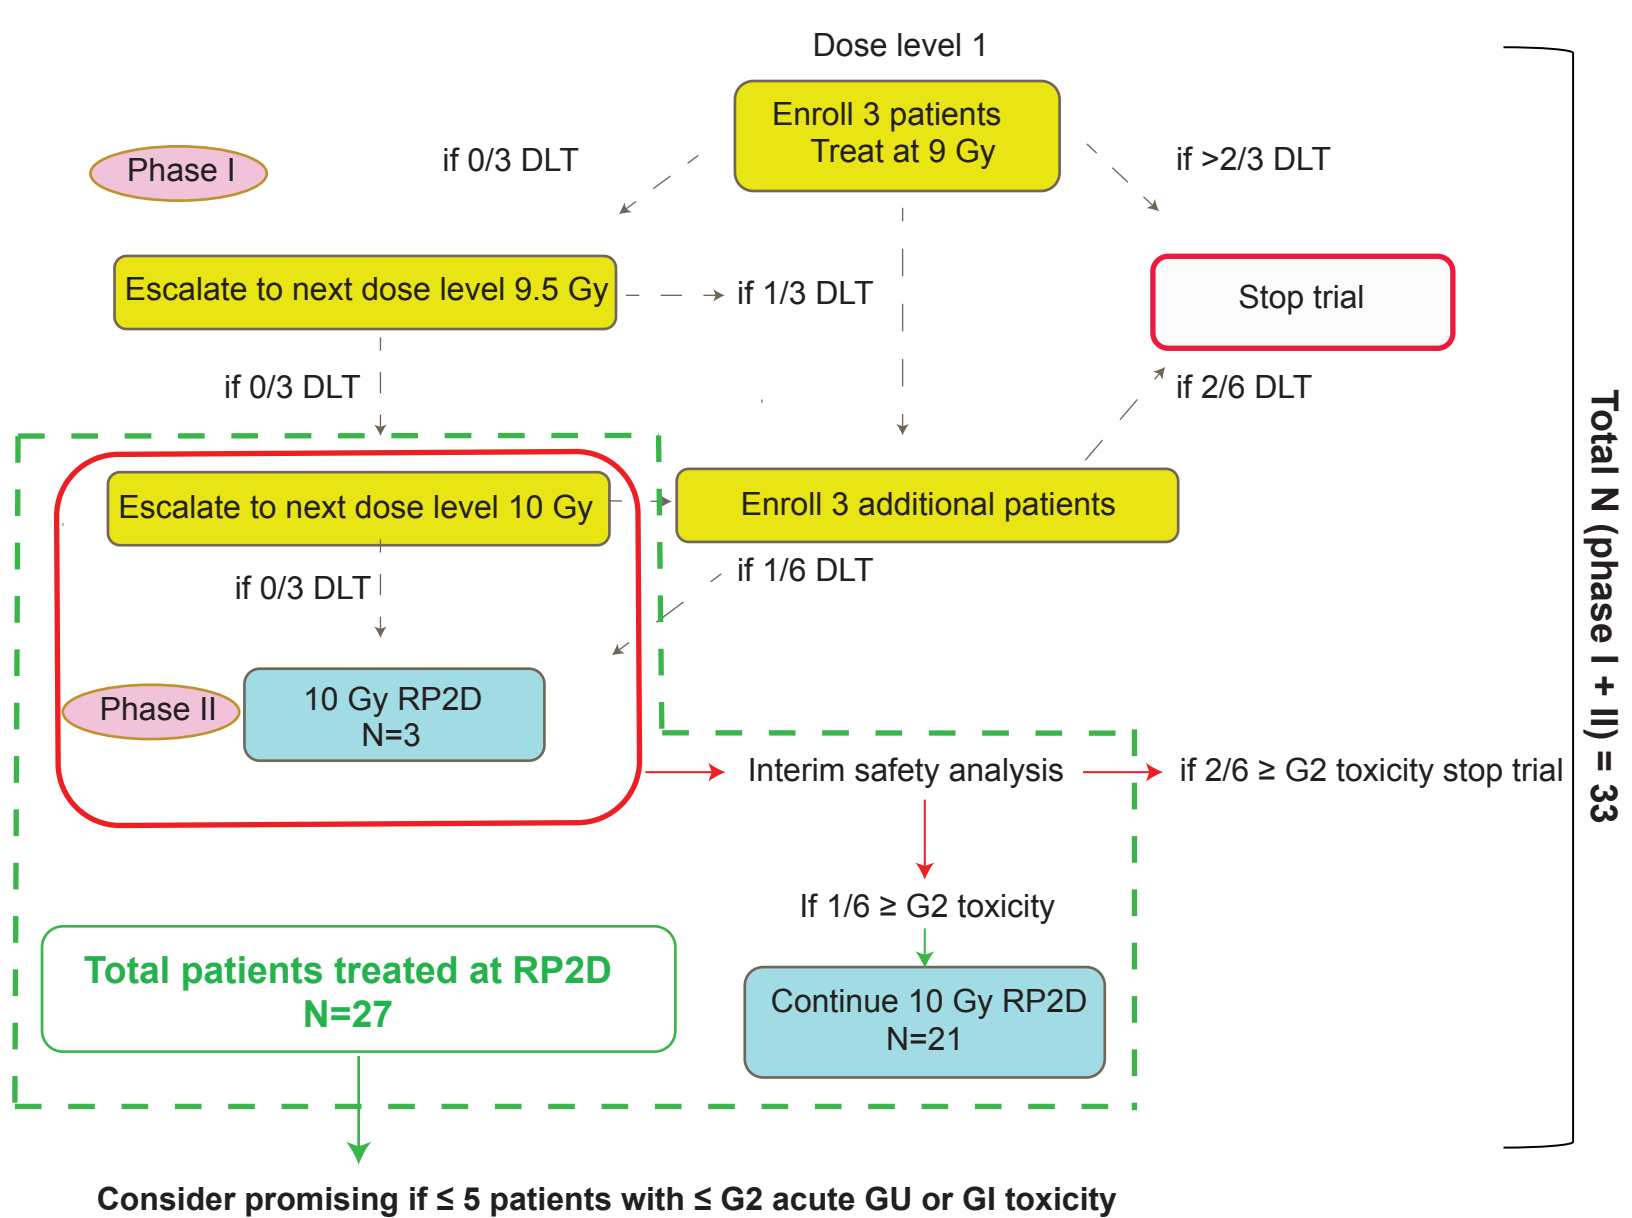

Supplementary Figure 1
